# Supplementary material for: Association of parental social network diversity with behaviour problems and resilience of offspring in a large population-based study of Japanese children
Source: HighWire-hosted journal article supplement (doi:10.1136/bmjopen-2019-035100), 2020-10-01
Supplement: bmjopen-2019-035100supp001_data_supplement.pdf [file bmjopen-2019-035100supp001_data_supplement.pdf]

## Supplementary material table of contents

Supplementary method 1. Social network index

Supplementary method 2. Parental involvement

Supplementary method 3. Mediation analysis

Supplementary table 1. Assessment of social network diversity

Supplementary table 2. The coefficients of interaction term between structural/ functional parental social network index and child's grade for child mental health



### Supplementary method 1. Social network index

The original version of social network index[1] is categorized as three measures such as number of high-contact roles (network diversity), number of people in social network and number of embedded networks. These scales can be found elsewhere[2] and made up with 12 questions about marital status; number of children they have and contact frequently; cohabitation/ frequent contact with their parents; cohabitation/frequent contact with their in-laws (or partner's parents); intimate and frequent contact with other relatives; number of friends they have and contact with frequently; belongings to church, temple, or other religious group; attendance to any regular classes; employment status; number of neighbors frequently contact with; involvement in regular volunteer work; and belonging to any groups in which they have members whom they actively interact with. So far, the association between social network diversity measured with Cohen's social network index and several dimension of health are reported multi-culturally and among diverse aged population[3-7].

In our analysis, we used corresponding questions from K-CHILD study. The supplement table 1 showed original questions and corresponding questions and answers in K-CHILD study.



## Supplementary method 2. Parental involvement

Parental involvement is measured with questions on the frequency of nine types of activities performed together between a child and parents. The assessed activities are tutoring/ supervision of child study; playing sports/ doing exercise; playing computer games; playing cards/ board games; talking about school; talking about socio-political issues; talking about recent TV programs; preparing meals; going out, which are chosen to reflect common daily parent-child interaction. Caregivers were asked to choose the most appropriate frequency (1 = merely; 2 = once or twice per month; 3 = once or twice per week; 4 = 3 or 4 times per week; 5 = every day) for each activity. Parental involvement score was calculated as arithmetic sum of the answers and ranged from 9 to 45 (Cronbach's  $\alpha = 0.65$ ).



### Supplementary method 3. Mediation analysis and sensitivity analysis for mediation analysis

We analyzed mediating roles of parent mental health and parental involvement using causal mediation analysis discussed elsewhere[8] with Stata command “medeff” and “medsens” in “mediation” package[9]. Causal mediation analysis is developed within counterfactual framework, which identifies causal effects by comparing the observed outcome and the potential outcomes. As a consequence, we would compute average causal mediation effect, direct effect and total effect. Causal mediation effect is defined as the change in outcomes corresponding to a change in the mediator from the value that would be realized under the non-exposed condition, to the value that would be observed under the exposed condition, while holding the exposure status constant. Direct effect is defined as the change in outcomes corresponding to a change in the exposure status with constant mediation status. Total effect is defined as the change in outcomes corresponding to a change in exposure status while allowing mediation status to change to coincide with a change in exposure status. Average causal mediation effect, average direct effect, and average total effect are obtained by averaging over the quantities of causal mediation effect, direct effect and total effect, respectively. In sensitivity analysis, we compute sensitivity parameter  $\rho$ , a correlation between the error for the mediation model and the error for the outcome model, which would arise when omitted confounders exist. Thus  $\rho = 0$  implies sequential ignorability is intact. Since there is no threshold for  $\rho$  to conclude obtained findings are valid, we also compute additional two quantities as that how much omitted confounders should explain remained variance in mediation model and outcome model (denoted as % of residuals)/ total variance (denoted as % of total variances) for average causal mediation effect to be zero.



Supplementary table 1. Assessment of social network diversity

| Assessed role         | Original questions                                                                                                                        | Corresponding questions in K-CHILD study                                          | Answer assumed to have role                                                          |
|-----------------------|-------------------------------------------------------------------------------------------------------------------------------------------|-----------------------------------------------------------------------------------|--------------------------------------------------------------------------------------|
| Spouse                | Which of the following best describe your marital status? - currently married/ never married/ separated/ divorced/ widowed                | What is your marital status? - married/ divorced/ widowed/ never married          | Married                                                                              |
| Parent                | How many of your children do you see or talk to on the phone at least once every 2 weeks?                                                 | N.A.                                                                              |                                                                                      |
| Child                 | Do you see or talk on the phone to either of your parents at least once every 2 weeks?                                                    | Who is your child's family member cohabiting with?                                | Maternal mother/ paternal mother/ maternal father/ paternal father                   |
| Child-in-law          | Do you see or talk on the phone to either of your partner's parents at least once every 2 weeks?                                          | N.A.                                                                              |                                                                                      |
| Close relative        | How many of these relatives do you see or talk to on the phone at least once every 2 weeks?                                               | Who is your child's family member cohabiting with?                                | Other relatives                                                                      |
| Close friend          | How many of these friends do you see or talk to at least once every 2 weeks?                                                              | Are you getting on well with your neighbors?                                      | Be on very intimate relationships/ on intimate relationships/ have relationships     |
| Church/ temple member | How many members of your church or religious group do you talk to at least once every 2 weeks?                                            | N.A.                                                                              |                                                                                      |
| Student               | How many fellow students or teachers do you talk to at least once every 2 weeks?                                                          | What is your occupation?                                                          | Student                                                                              |
| Employee              | How many people do you supervise? / How many people at work do you talk to at least once every 2 weeks?                                   | What is your occupation?                                                          | Any occupation except for house wife, student, retirement, looking for jobs, no jobs |
| Neighbor              | How many of your neighbors do you visit or talk to at least once every 2 weeks?                                                           | Do you usually share food with your local residents?                              | On a daily basis/ frequently/ sometimes                                              |
| Volunteer             | How many people involved in this volunteer work do you talk to about volunteering-related issues at least once every 2 weeks?             | N.A.                                                                              |                                                                                      |
| Group member          | Do you belong to any groups in which you talk to one or more members of the group about group-related issues at least once every 2 weeks? | Are you belonging to group activities such as sport, NPO, residents' association? | Yes                                                                                  |



Supplementary table 2. The coefficients of interaction term between structural/ functional parental social network index and child's grade for child mental health

| Interaction term                          | Total difficulties score |               | Prosocial behavior |               | Resilience |               |
|-------------------------------------------|--------------------------|---------------|--------------------|---------------|------------|---------------|
|                                           | B                        | 95%CI         | B                  | 95%CI         | B          | 95%CI         |
| Structural social network * child's grade | -0.01                    | -0.04 to 0.02 | 0.02               | 0.00 to 0.03  | 0.14       | 0.04 to 0.24  |
| Functional social network * child's grade | -0.01                    | -0.04 to 0.01 | 0.00               | -0.01 to 0.01 | 0.08       | -0.00 to 0.16 |

Model adjusted for child's sex, respondents, marital status, maternal age, parental age difference, maternal educational attainment, paternal occupation, and caregiver's self-rated health



## References

1. Cohen, S., et al., *Social ties and susceptibility to the common cold*. Jama, 1997. **277**(24): p. 1940-1944.
2. Cohen, S., *Social network index SNI*. Available from <http://www.midss.org/content/social-network-index-sni>.
3. Molesworth, T., et al., *Social network diversity and white matter microstructural integrity in humans*. Social cognitive and affective neuroscience, 2015. **10**(9): p. 1169-1176.
4. Hamrick, N., S. Cohen, and M.S. Rodriguez, *Being popular can be healthy or unhealthy: stress, social network diversity, and incidence of upper respiratory infection*. Health Psychology, 2002. **21**(3): p. 294.
5. Crookes, D.M., et al., *Social networks and social support for healthy eating among Latina breast cancer survivors: implications for social and behavioral interventions*. Journal of Cancer Survivorship, 2016. **10**(2): p. 291-301.
6. Mowbray, O., A. Quinn, and J.A. Cranford, *Social networks and alcohol use disorders: findings from a nationally representative sample*. The American journal of drug and alcohol abuse, 2014. **40**(3): p. 181-186.
7. Kaczkowski, W., C.L. Brennan, and K.M. Swartout, *In good company: Social network diversity may protect men against perpetrating sexual violence*. Psychology of violence, 2017. **7**(2): p. 276.
8. Imai, K., L. Keele, and D. Tingley, *A general approach to causal mediation analysis*. Psychological methods, 2010. **15**(4): p. 309.
9. Hicks, R. and D. Tingley, *Causal mediation analysis*. The Stata Journal, 2011. **11**(4): p. 605-619.
